# Supplementary material
Source: PubMed Central journal article supplement (PMC3954976)
Supplement: NIHMS560955-supplement-ESI.pdf [file NIHMS560955-supplement-ESI.pdf]

## Supplementary Information

### Interfacial Interactions between Natural RBC Membranes and Synthetic Polymeric Nanoparticles

Brian T. Luk<sup>ac‡</sup>, Che-Ming Jack Hu<sup>bc‡</sup>, Ronnie H. Fang<sup>bc</sup>, Diana Dehaini<sup>bc</sup>, Cody Carpenter<sup>bc</sup>, Weiwei Gao<sup>bc</sup>, and Liangfang Zhang<sup>bc\*</sup>

<sup>a</sup> Department of Bioengineering, University of California, San Diego, La Jolla, CA 92093, USA

<sup>b</sup> Department of Nanoengineering, University of California, San Diego, La Jolla, CA 92093, USA

<sup>c</sup> Moores Cancer Center, University of California, San Diego, La Jolla, CA 92093, USA

<sup>‡</sup> These authors contributed equally to this work.

\*Corresponding author: [zhang@ucsd.edu](mailto:zhang@ucsd.edu)

#### TABLE OF CONTENTS

1. Theoretical Calculations
2. Supporting Figures
3. Supporting References

#### 1. Theoretical Calculations

##### RBC membrane materials required to fully cover differently sized PLGA cores:

Density of PLGA polymer:  $\rho = 1.25 \text{ g mL}^{-1}$  [1]

##### For 65 nm cores:

Radius of the PLGA core:  $r = 32.5 \text{ nm}$

Radius of the RBC-NP:  $r_{\text{np}} = 40 \text{ nm}$

Mass per PLGA core:  $M_{\text{core}} = \rho \times \frac{4}{3} \pi r^3 = 1.80 \times 10^{-16} \text{ g per particle}$

Number of nanoparticles made of 1 mg of PLGA polymer:  $N_{\text{np}} = 1 \text{ mg} / M_{\text{core}} = 5.57 \times 10^{12}$

Surface area of each RBC-NP:  $S_{\text{np}} = 4 \pi r_{\text{np}}^2 = 0.020 \text{ } \mu\text{m}^2 \text{ per particle}$

Total surface area of RBC-NPs made of 1 mg of PLGA polymer:

$$S_{\text{total}} = N_{\text{np}} \times S_{\text{np}} \approx 1.12 \times 10^{11} \mu\text{m}^2$$

**Estimated amount of blood for complete coating of 1 mg of 65 nm PLGA particles**

Blood volume =  $S_{\text{total}} / \text{average surface area of mouse RBC (75 } \mu\text{m}^2) [2] / \text{concentration of RBCs in mouse blood (10}^{10}\text{/mL) [3]}$   
 $\approx \mathbf{150 \mu\text{L}}$

**For 100 nm cores:**

Radius of the PLGA core:  $r = 50 \text{ nm}$

Radius of the RBC-NP:  $r_{\text{np}} = 57.5 \text{ nm}$

Mass per PLGA core:  $M_{\text{core}} = \rho \times \frac{4}{3} \pi r^3 = 6.54 \times 10^{-16} \text{ g per particle}$

Number of nanoparticles made of 1 mg of PLGA polymer:  $N_{\text{np}} = 1 \text{ mg} / M_{\text{core}} = 1.53 \times 10^{12}$

Surface area of each RBC-NP:  $S_{\text{np}} = 4 \pi r_{\text{np}}^2 = 0.042 \mu\text{m}^2 \text{ per particle}$

Total surface area of RBC-NPs made of 1 mg of PLGA polymer:

$$S_{\text{total}} = N_{\text{np}} \times S_{\text{np}} \approx 6.35 \times 10^{10} \mu\text{m}^2$$

**Estimated amount of blood for complete coating of 1 mg of 100 nm PLGA particles**

Blood volume =  $S_{\text{total}} / \text{average surface area of mouse RBC (75 } \mu\text{m}^2) [2] / \text{concentration of RBCs in mouse blood (10}^{10}\text{/mL) [3]}$   
 $\approx \mathbf{85 \mu\text{L}}$

**For 120 nm cores:**

Radius of the PLGA core:  $r = 60 \text{ nm}$

Radius of the RBC-NP:  $r_{\text{np}} = 67.5 \text{ nm}$

Mass per PLGA core:  $M_{\text{core}} = \rho \times \frac{4}{3} \pi r^3 = 9.05 \times 10^{-16} \text{ g per particle}$

Number of nanoparticles made of 1 mg of PLGA polymer:  $N_{np} = 1 \text{ mg} / M_{core} = 8.84 \times 10^{11}$

Surface area of each RBC-NP:  $S_{np} = 4 \pi r_{np}^2 = 0.057 \mu\text{m}^2$  per particle

Total surface area of RBC-NPs made of 1 mg of PLGA polymer:

$$S_{total} = N_{np} \times S_{np} \approx 5.06 \times 10^{10} \mu\text{m}^2$$

**Estimated amount of blood for complete coating of 1 mg of 120 nm PLGA particles**

Blood volume =  $S_{total} /$  average surface area of mouse RBC ( $75 \mu\text{m}^2$ ) [2]/ concentration of

RBCs in mouse blood ( $10^{10}/\text{mL}$ ) [3]

$$\approx 68 \mu\text{L}$$

**For 200 nm cores:**

Radius of the PLGA core:  $r = 100 \text{ nm}$

Radius of the RBC-NP:  $r_{np} = 107.5 \text{ nm}$

Mass per PLGA core:  $M_{core} = \rho \times \frac{4}{3} \pi r^3 = 5.23 \times 10^{-15} \text{ g}$  per particle

Number of nanoparticles made of 1 mg of PLGA polymer:  $N_{np} = 1 \text{ mg} / M_{core} = 1.9 \times 10^{11}$

Surface area of each RBC-NP:  $S_{np} = 4 \pi r_{np}^2 = 0.145 \mu\text{m}^2$  per particle

Total surface area of RBC-NPs made of 1 mg of PLGA polymer:

$$S_{total} = N_{np} \times S_{np} \approx 2.77 \times 10^{10} \mu\text{m}^2$$

**Estimated amount of blood for complete coating of 1 mg of 200 nm PLGA particles**

Blood volume =  $S_{total} /$  average surface area of mouse RBC ( $75 \mu\text{m}^2$ ) [2]/ concentration of

RBCs in mouse blood ( $10^{10}/\text{mL}$ ) [3]

$$\approx 37 \mu\text{L}$$

**For 340 nm cores:**

Radius of the PLGA core:  $r = 170 \text{ nm}$

Radius of the RBC-NP:  $r_{np} = 177.5 \text{ nm}$

Mass per PLGA core:  $M_{core} = \rho \times \frac{4}{3}\pi r^3 = 2.57 \times 10^{-14} \text{ g per particle}$

Number of nanoparticles made of 1 mg of PLGA polymer:  $N_{np} = 1 \text{ mg} / M_{core} = 3.9 \times 10^{10}$

Surface area of each RBC-NP:  $S_{np} = 4 \pi r_{np}^2 = 0.396 \mu\text{m}^2$  per particle

Total surface area of RBC-NPs made of 1 mg of PLGA polymer:

$$S_{total} = N_{np} \times S_{np} \approx 1.54 \times 10^{10} \mu\text{m}^2$$

**Estimated amount of blood for complete coating of 1 mg of 340 nm PLGA particles**

Blood volume =  $S_{total} / \text{average surface area of mouse RBC } (75 \mu\text{m}^2) [2] / \text{concentration of RBCs in mouse blood } (10^{10}/\text{mL}) [3]$

$$\approx \mathbf{21 \mu\text{L}}$$

**Estimation of sialic acid density on fully coated RBC-NPs with 100 nm PLGA cores:**

Sialic acid content per  $10^9$  RBCs =  $0.013 \mu\text{mol} [4]$

Amount of blood for complete coating of 1 mg of 100 nm PLGA nanoparticles =  $85 \mu\text{L}$

Total sialic acid content on fully coated RBC-NPs with 100 nm cores = concentration of

$$\text{RBCs in mouse blood } (10^{10}/\text{mL}) \times 85 \mu\text{L} \times 0.013 \mu\text{mol}/10^9 \text{ RBCs} =$$

$$0.01105 \mu\text{mol}$$

Number of 100 nm nanoparticles made of 1 mg of PLGA polymer:  $N_{np} = 1 \text{ mg} / M_{core} = 1.53 \times 10^{12}$

Average sialic acid content per RBC-NP =  $0.01105 \mu\text{mol} \times 6.022 \times 10^{23} / M_{core} = \mathbf{43,500}$

**sialic acid per RBC-NP**

## 2. Supporting Figures

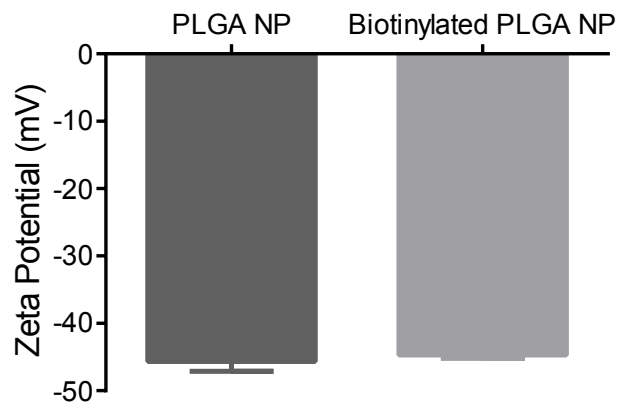

**Figure S1.** Bare PLGA cores and biotinylated PLGA cores have similar surface zeta potential. Error bars represent standard deviation (n=3).

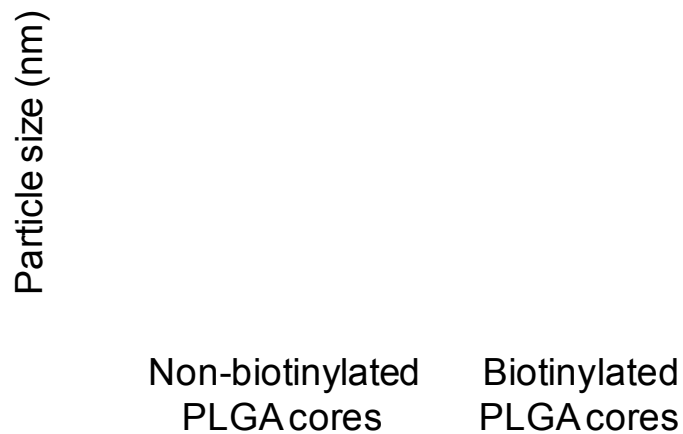

**Figure S2.** Effect of the presence of streptavidin on the size of non-biotinylated and biotinylated PLGA cores. Non-biotinylated cores did not show significant change in size upon addition of streptavidin, but the size of the biotinylated cores increased dramatically in the presence of streptavidin due to cross-linking of the biotinylated cores.

**A**

Particle Size (nm)

**B**

Zeta Potential (mV)

**Figure S3.** Effect of sialidase treatment on the size and surface zeta potential of bare PLGA NPs and RBC-NPs. (A) Sialidase treatment did not cause any significant change in size for bare NPs and RBC-NPs. (B) Sialidase treatment of RBC-NPs shifted the zeta potential from -23 mV to -0.6 mV, but had negligible effect on the zeta potential of bare PLGA NPs. Error bars represent standard deviation (n=3).

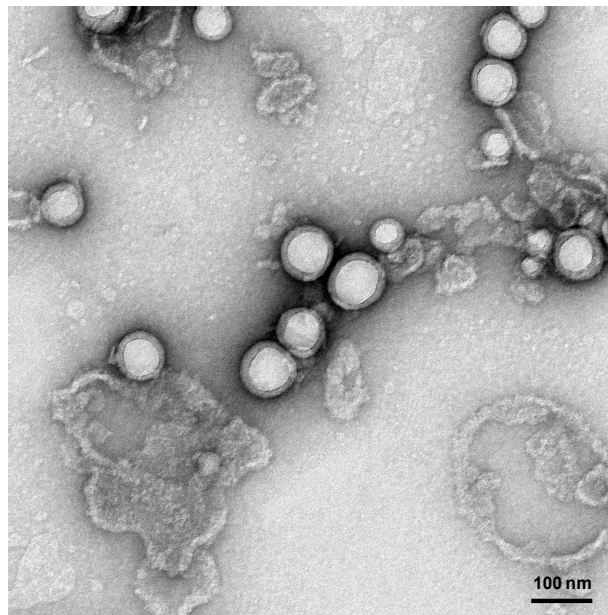

**Figure S4.** RBC-NPs prepared with membrane-to-particle ratio of 200  $\mu$ L of blood per 1 mg of polymer. RBC-NPs show unilamellar membrane coating despite there being excess membrane materials, which remained in vesicular form.

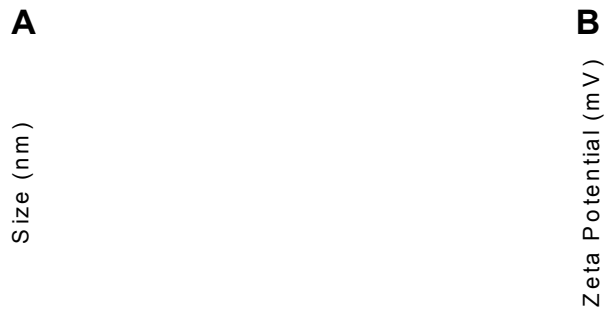

**Figure S5.** The sizes (A) and surface zeta potential (B) of negatively (PLGA) and positively (PLGA-PEI) charged cores, measured by dynamic light scattering (DLS). Error bars represent standard deviation (n=3).

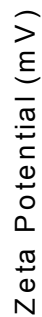

**Figure S6.** Surface zeta potential of RBC membrane vesicles measured by DLS. Error bars represent standard deviation (n=3).

### 3. Supporting References

- [1] R. Qi, R. Guo, M. Shen, X. Cao, L. Zhang, J. Xu, *et al.*, *J. Mater. Chem.*, 2010, **20**, 10622.
- [2] R. Waugh, I. Sarelius, *Am. J. Physiol.-Cell Ph.*, 1996, **271**, C1847.
- [3] E. Russell, E. Neufeld, C. Higgins, *P. Soc. Exp. Biol. Med.*, 1951, **78**,761.
- [4] A. Miller, J. Katz, J. Sullivan. *Cancer Res.*, 1963, **23**, 485.
